# Read *The American Journal of Psychiatry* Online

Activate your FREE online access—It's as easy as 1, 2, 3!

To begin activation, go to [ajp.psychiatryonline.org](http://ajp.psychiatryonline.org) and click **SUBSCRIBE**

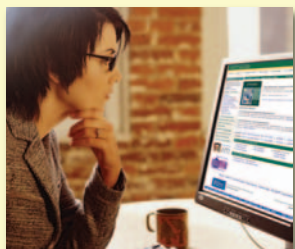

For APA Members and Other Individuals:

1. Click on **ACTIVATE Your Member or Individual (Non-Member) Subscription**
2. Locate your 10-digit Member/Customer Number\* on your journal mailing label above your name. Be sure to enter all 10 digits, including any leading zeros.
3. Enter your number in the box and click **SUBMIT**.

On the next screen, you'll register your subscription and create a username and password that can be used immediately to access your online subscription.

\*If you are an APA Member, in most cases the number on your label will be your Member Number; if it is not, please enter your APA Member Number (with enough leading zeros to create 10 digits) instead of the number on your mailing label.

For Institutions:

1. Click on **ACTIVATE Your Institutional Subscription**.
2. Locate your Customer Number on the journal mailing label above your name. Be sure to enter all 10-digits.
3. Enter your number in the box and click **SUBMIT**. On the next screen, you'll have the opportunity to enter IP addresses for your institution to provide seamless access for your patrons.

Member/Customer Number

AJP3000056866 CAR-RT LOT88 C-015  
John Q. Sample  
Mental Health Professional  
1000 Wilson Blvd STE 1825  
Arlington VA 22209-3924 01654

## Benefits of Online Activation

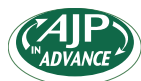

**AJP in Advance**—key research articles posted on the AJP website well in advance of their appearance in print.

**Back issue access to Volume 1, Issue 1**, starting with the *American Journal of Insanity* in 1844. (Available to institutions as a separate one-time purchase.)

**AJP CME**—interactive quizzes that offer *AMA PRA Category 1 Credits™* for selected articles from each issue (with paid subscription to the CME Course Program).

**AJP Audio**—MP3-format program summarizing findings from key articles from each issue.

**Residents' Journal**—the gateway to AJP articles and features that have most value to residents in their training.

**Precise and powerful searching** by author, keyword, and/or citation details—within any one journal, across the entire PsychiatryOnline journal collection, or across all HighWire journals.

**PubMed, CrossRef, and Google Scholar links**—from cited references to abstracts and full text; to similar articles; to other articles by the same lead authors.

**eTOCs**—Get advance email alerts with the table of contents from the latest issue.

For more information or if you cannot locate your customer number, please contact APPI Customer Service:  
Call: 1.800.368.5777 or 703.907.7322  
Email: [appi@psych.org](mailto:appi@psych.org)

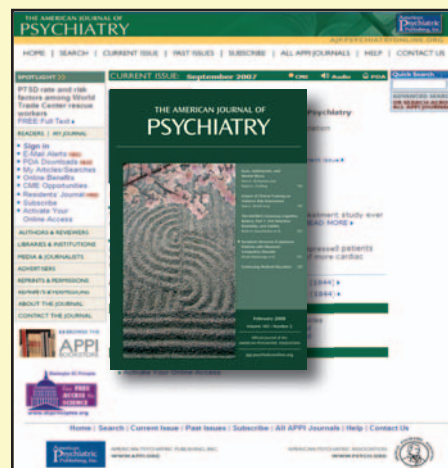

American  
Psychiatric  
Publishing, Inc.

The First and Last Word in Psychiatry

AH810

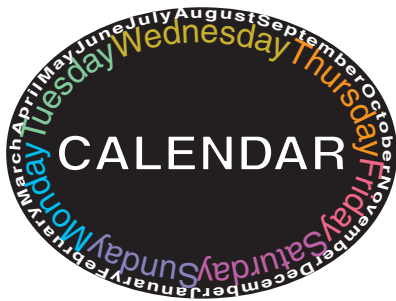

For free listing of your organization's official annual or regional meeting, please send us the following information: sponsor, location, inclusive dates, type and number of continuing education credits (if available), and the name, address, and telephone number of the person or group to contact for more information. In order for an event to appear in our listing, all notices and changes must be received at least 6 months in advance of the meeting and should be addressed to:

Calendar, American Journal of Psychiatry, 1000 Wilson Boulevard, Suite 1825, Arlington, VA 22209-3901, [jblair@psych.org](mailto:jblair@psych.org) (e-mail).

Because of space limitations, only listings of meetings of the greatest interest to Journal readers will be included.

## JUNE

**June 18–22**, American Psychoanalytic Association 97th Annual Meeting, Atlanta, GA. Contact: Dottie Jeffries, Director of Public Affairs, (212) 752-0450 x29 (tel), [djeffries@apsa.org](mailto:djeffries@apsa.org) (e-mail).

**June 19–22**, Annual Meeting of the Society for the Study of Psychiatry and Culture, "The Cultural Formulation and Cultural/Gender Issues in DSM-V," San Francisco, CA. Contact: Jim Boehnlein, M.D., Oregon Health and Science University, (505) 494-6653 (tel), [sspcadmin@gmail.com](mailto:sspcadmin@gmail.com) (e-mail) or Francis Lu, M.D. [francis.lu@sfggh.org](mailto:francis.lu@sfggh.org) (e-mail)

**June 19–21**, Thematic Conference on Depression and Relevant Psychiatric Condition in Primary Care, Granada, Spain. Contact: Francisco Torres-González, Andalusian Research Group on Mental Health, University of Granada, Avenida de Madrid 11, Granada 18071, Spain; (34) 958-272651 (tel), (34) 958-275214 (fax), [ftorres@ugr.es](mailto:ftorres@ugr.es) (e-mail).

**June 21–25**, 1st Schizophrenia International Research Society Conference, Venice, Italy. Contact: Schizophrenia International Research Society, [schizophreniasoc@aol.com](mailto:schizophreniasoc@aol.com) (e-mail), [www.schizophreniaconference.org](http://www.schizophreniaconference.org) (web site).

## SEPTEMBER

**September 4–7**, Canadian Psychiatric Association 58th Annual Meeting, Vancouver, British Columbia, Canada. Contact: 260-441 MacLaren Street, Ottawa, ON K2P 2H3, Canada; (800) 267-1555 (tel), (613) 234-9857 (fax), [cpa@medical.org](mailto:cpa@medical.org) (e-mail).

**September 25–26**, Critical Issues in the Care of Older Adults: Managing Depression & Substance Use in Later Life, Ann Arbor, MI. Contact: Registrar, Office of Continuing Medical Education, University of Michigan Medical School, G1200 Towsley Center, 1500 E. Medical Center Drive, SPC 5201, Ann Arbor, MI 48109-5201, (734) 763-1400 (tel), (734) 936-1641 (fax), [OCME@umich.edu](mailto:OCME@umich.edu) (e-mail), <http://cme.med.umich.edu> (web site).

## OCTOBER

**October 2–5**, 60th Institute on Psychiatric Services, American Psychiatric Association, Chicago, IL. Contact: Jill Gruber, APA Annual Meetings Dept., 1000 Wilson Blvd., Ste. 1825, Arlington, VA 22209; (703) 907-7815.

**October 17–19**, 3rd International Conference on Schizophrenia (IconS III), Chennai, India. Contact: Schizophrenia Research Foundation (SCARF), [scarf@vsnl.com](mailto:scarf@vsnl.com) (e-mail), [www.icons-scarf.org](http://www.icons-scarf.org) (web site).

**October 28–November 2**, 55th Annual Meeting of the American Academy of Child and Adolescent Psychiatry, Chicago. Contact: AACAP, 3615 Wisconsin Avenue, N.W., Washington, DC 20016-3007; (202) 966-7300 (tel), (202) 966-2891 (fax), [meetings@aacap.org](mailto:meetings@aacap.org) (e-mail), [www.aacap.org](http://www.aacap.org) (web site).

## NOVEMBER

**November 14–17**, Annual Conference of the International Society for the Study of Trauma and Dissociation, Chicago. Contact: Heidi Walker, Executive Director; [hwalker@amg-inc.com](mailto:hwalker@amg-inc.com) (e-mail), [isst-d.org](http://isst-d.org) (web site).

## FEBRUARY 2009

**February 18–22**, Annual Meeting of the American Neuropsychiatric Association (ANPA), San Antonio, TX. Contact: ANPA office; (614) 447-2077 (tel), (614) 263-4366 (fax), [anpa@osu.edu](mailto:anpa@osu.edu) (e-mail), [www.anpaonline.org](http://www.anpaonline.org) (web site).

**February 25–March 1**, American College of Psychiatrists Annual Meeting, Tucson, AZ. Contact: 122 South Michigan Avenue, Suite 1360, Chicago, IL 60603; (312) 662-1020 (tel), (312) 662-1025 (fax), [angel@ACPsych.org](mailto:angel@ACPsych.org) (e-mail).

## MARCH

**March 5–8**, 22nd Annual Meeting of the American Association for Geriatric Psychiatry, Honolulu. Contact: AAGP, 7910 Woodmont Ave., Ste. 1050, Bethesda, MD 20814-3004; (301) 654-7850 (tel), (301) 654-4137 (fax), [www.aagpmeeting.org](http://www.aagpmeeting.org) (web site).

**March 27–29**, 3rd International Conference of The International Society of Interpersonal Psychotherapy (ISIPT), New York City, NY. Contact: 2009 ISIPT Planning Committee; [hv2009@columbia.edu](mailto:hv2009@columbia.edu) (e-mail).

## APRIL

**April 22–26**, Annual Meeting and Scientific Sessions of the Society of Behavioral Medicine, Montreal, Quebec. Contact: Society of Behavioral Medicine, (414) 918-3156 (tel), (414) 276-3349 (fax), [info@sbm.org](mailto:info@sbm.org) (e-mail).

Continued on page A44

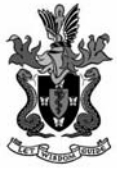

# THE BRITISH JOURNAL OF PSYCHIATRY

May 2008, VOL. 192

- A16 Editorial Board**
- A18 Highlights of this issue**
- Editorials**
- 321 Prescribing in pregnancy**  
C. Paton
- 323 Using intervention trials in developmental psychiatry to illuminate basic science**  
J. Green and G. Dunn
- In debate**
- 326 Proposals for massive expansion of psychological therapies would be counterproductive across society**  
D. Summerfield /D. Veale
- 331 Invited commentary on... Proposals for massive expansion of psychological therapies would be counterproductive across society**  
M. King
- 332 Alexandra Reinhardt (1960–2004). River and Red Butterfly—psychiatry in pictures**
- Papers**
- 333 Birth weight of infants after maternal exposure to typical and atypical antipsychotics: prospective comparison study**  
J.J. Newham, S.H. Thomas, K. MacRitchie, P.R. McElhatton, and R.H. McAllister-Williams
- 338 Effects of timing and duration of gestational exposure to serotonin reuptake inhibitor antidepressants: population-based study**  
T.F. Oberlander, W. Warburton, S. Misri, J. Aghajanian, and C. Hertzman
- 344 Duration of antidepressant use during pregnancy and risk of major congenital malformations**  
É. Ramos, M. St-André, É. Rey, D. Oraichi, and A. Béard
- 351 Medical disorders in people with recurrent depression**  
A. Farmer, A. Korszun, M.J. Owen, N. Craddock, L. Jones, I. Jones, J. Gray, R.J. Williamson, and P. McGuffin
- 356 Affective modulation of anterior cingulate cortex in young people at increased familial risk of depression**  
Z.N. Mannie, R. Norbury, S.E. Murphy, B. Inkster, C.J. Harmer, and P.J. Cowen
- 361 Insane in private dwellings - 100 years ago**  
H. Rollin
- 362 Prevalence of common mental disorders in general practice attendees across Europe**  
M. King, I. Nazareth, G. Levy, C. Walker, R. Morris, S. Weich, J.À. Bellón-Saameño, B. Moreno, I. Svab, D. Rotar, J. Rifel, H.-I. Maarros, A. Aluoja, R. Kalda, J. Neeleman, M.I. Geerlings, M. Xavier, M.C. de Almeida, B. Correa, and F. Torres-Gonzalez
- 367 When I heard them -- poems by doctors**  
Merrill Moore
- 368 Disability and treatment of specific mental and physical disorders across the world**  
J. Ormel, M. Petukhova, S. Chatterji, S. Aguilar-Gaxiola, J. Alonso, M.C. Angermeyer, E.J. Bromet, H. Burger, K. Demyttenaere, G. de Girolamo, J.M. Haro, I. Hwang, E. Karam, N. Kawakami, J.P. Lépine, M.E. Medina-Mora, J. Posada-Villa, N. Sampson, K. Scott, T.B. Ustun, M. Von Korff, D.R. Williams, M. Zhang, and R.C. Kessler
- 376 Post-traumatic stress disorder in serious accidental injury: 3-year follow-up study**  
U. Hepp, H. Moergeli, S. Buchi, H. Bruchhaus-Steinert, B. Kraemer, T. Sensky and U. Schnyder
- 384 Predicting violent reconvictions using the HCR-20**  
N.S. Gray, J. Taylor and R.J. Snowden
- 387 Why psychiatry still needs psychoanalysis—in 100 words**  
J. Holmes
- Short reports**
- 388 Clinical differences between bipolar and unipolar depression**  
L. Forty, D. Smith, L. Jones, I. Jones, S. Caesar, C. Cooper, C. Fraser, K. Gordon-Smith, S. Hyde, A. Farmer, P. McGuffin and N. Craddock
- 390 Efficacy of Quichua healers as psychiatric diagnosticians**  
M. Incayawar
- 392 Predictive validity of acute stress disorder in children and adolescents**  
T. Dalgleish, R. Meiser-Stedman, N. Kassam-Adams, A. Ehlers, F. Winston, P. Smith, B. Bryant, R.A. Mayou and W. Yule
- Columns**
- 394 Correspondence**
- 396 Book reviews**
- 398 Contents of Advances in Psychiatric Treatment**
- 399 Contents of the American Journal of Psychiatry**
- 400 From the Editor's desk**

## New Feature for Residents!

# The American Journal of Psychiatry Residents' Journal

A FREE electronic publication produced specifically for psychiatry residents

The Residents' Journal contains special links to full text of the articles from the current *American Journal of Psychiatry* and to AJP Audio, a downloadable MP3 file featuring highlights from the issue. In addition, this e-mail bulletin contains two exclusive features:

### Journal Club Kit

A featured article presented with an overview discussing the reasons for its selection, discussion questions, and an editorial by a senior member of the field placing the article into clinical context.

### Educational Article

Case presentation that illustrates a major point in clinical practice or highlights unique treatment approaches.

Plus lively contributions from your fellow residents:

- Instructive cases
- Unique clinical or educational programs
- Perspectives on training and career development
- Discussions arising from journal club discussions

The American Journal of Psychiatry  
**Residents' Journal**  
May 2008: Volume 3, Issue 5

**Contents**

The SSRI Safety Controversy: A Resident's Perspective  
Andrew Nanton 2

A to Z List of "Buzzwords" for the Boards  
Rajkumar Kalapatapu 3

2008 APA Annual Meeting 4

One of the privileges of editing the *American Journal of Psychiatry* and initiating the *Residents' Journal* is that we help open doors for people with gifts that are greater than we could have imagined. Every week at the *Journal* we receive articles of truly breathtaking scope and importance, contributed by authors who wish to use our pages to reach psychiatrists around the world. The *Residents' Journal* has already garnered that same respect. What the *Residents' Journal* has accomplished this year is far greater than any of us could ever have imagined.

The Resident's Journal is sent free-of-charge to all psychiatry residents. Anyone interested in being included on the distribution list should contact Lisa Devine, the Residents' Journal staff editor at [ajp@psych.org](mailto:ajp@psych.org) with "Subscribe to Residents' Journal" in the subject line.

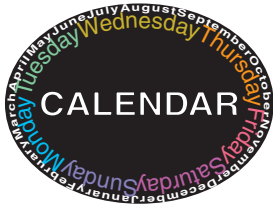

Continued from page A36

## OCTOBER

**October 27–November 1**, 56th Annual Meeting of the American Academy of Child and Adolescent Psychiatry, Honolulu, HI. Contact: AACAP, 3615 Wisconsin Avenue, N.W., Washington, DC 20016-3007; (202) 966-7300 (tel), (202) 966-2891 (fax), [meetings@aacap.org](mailto:meetings@aacap.org) (e-mail), [www.aacap.org](http://www.aacap.org) (web site).

### FREE AUDIO! **Have You Heard?**

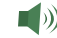

You can listen to highlights of *The American Journal of Psychiatry* by downloading a monthly free .mp3 audio file from our website (<http://ajp.psychiatryonline.org/misc/audio.dtl>) or by subscribing to the AJP Audio podcast at iTunes or other feed reader.

## MAY

**May 16–21**, 162nd Annual Meeting of the American Psychiatric Association, San Francisco, CA. Contact: Cathy Nash, APA Annual Meetings Dept., 1000 Wilson Blvd., Ste. 1825, Arlington, VA 22209; (703) 907-7822.

## AUGUST

**August 27–30**, Canadian Psychiatric Association 59th Annual Meeting, St. Johns, Newfoundland, Canada. Contact: 260-441 MacLaren Street, Ottawa, ON K2P 2H3, Canada; (800) 267-1555 (tel), (613) 234-9857 (fax), [conferene@cpa-apc.org](mailto:conferene@cpa-apc.org) (e-mail), [www.cpa-apc.org](http://www.cpa-apc.org) (web site).

### Continuing Medical Education

Three articles in each issue provide an opportunity to earn up to 1 hour category 1 CME credit each by taking a course covering the content. Credit available online only with purchased subscription to AJP's CME program. Visit [cme.psychiatryonline.org](http://cme.psychiatryonline.org) for details.

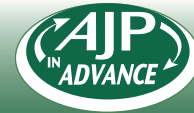

### GET AHEAD!

Subscribers can now view PDFs of all new research articles before print publication by clicking on the "AJP in Advance" logo at the AJP website ([ajp.psychiatryonline.org](http://ajp.psychiatryonline.org)).

## Coming in the July 2008 issue\*

### THE AMERICAN JOURNAL OF PSYCHIATRY

#### *Clinical Symptom Responses to Atypical Antipsychotic Medications in Alzheimer's Disease: Phase 1 Outcomes From the CATIE-AD Effectiveness Trial*

D.L. Sultzer, S.M. Davis, P.N. Tariot, K.S. Dagerman, B.D. Lebowitz, C.G. Lyketsos, R.A. Rosenheck, J.K. Hsiao, J.A. Lieberman, L.S. Schneider, and CATIE-AD Study Group

#### *Empirically Derived Decision Trees for the Treatment of Late-Life Depression*

C. Andreescu, B.H. Mulsant, P.R. Houck, E.M. Whyte, S. Mazumdar, A.Y. Dombrowski, B.G. Pollock, and C.F. Reynolds

#### *Depressive State- and Disease-Related Alterations in Neural Responses to Affective and Executive Challenges in Geriatric Depression*

L. Wang, M.D., K.R. Krishnan, D.C. Steffens, G.G. Potter, F. Dolcos, and G. McCarthy

#### *Hippocampal and Amygdalar Volumes in Psychotic and Nonpsychotic Unipolar Depression*

J. Keller, L. Shen, R.G. Gomez, A. Garrett, H. Brent Solvason, A. Reiss, and A.F. Schatzberg

\*Can't wait? Visit [ajp.psychiatryonline.org](http://ajp.psychiatryonline.org) and click the "AJP in Advance" logo to see all articles uploaded in advance of print!
