# THE AMERICAN JOURNAL OF PSYCHIATRY

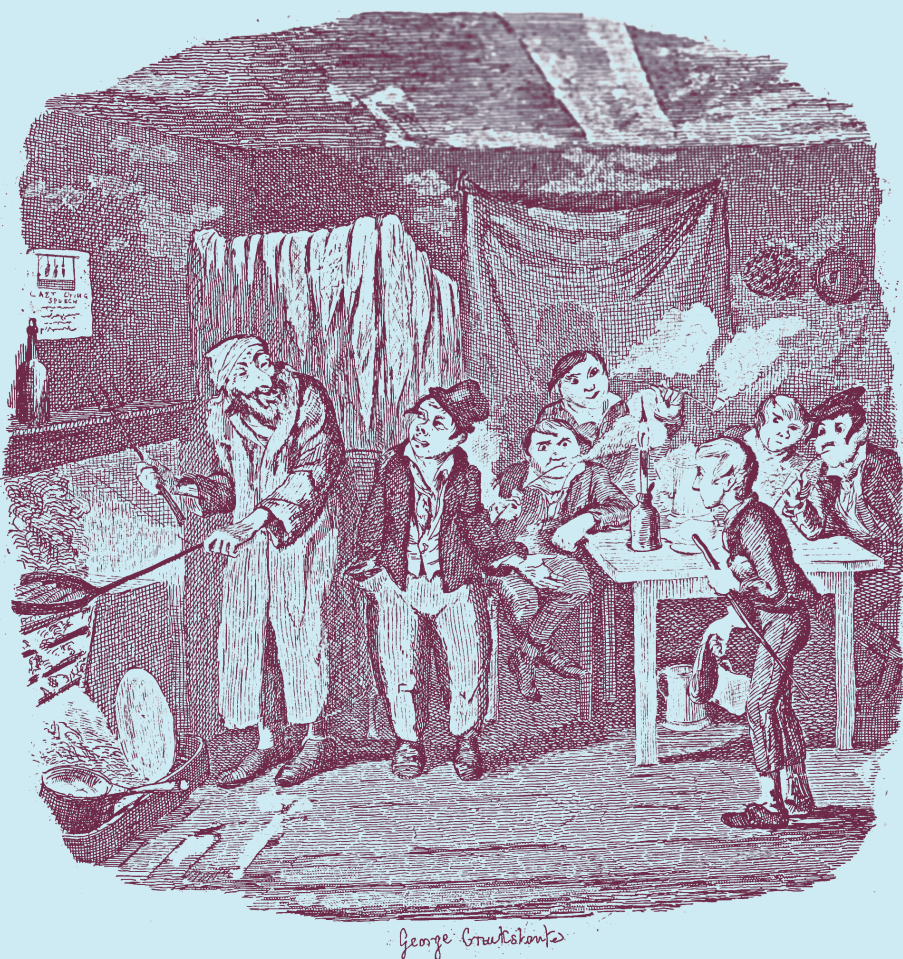

## Assessing the Economic Costs of Serious Mental Illness

Thomas R. Insel, M.D. 663

## Chronic Insomnia

Daniel J. Buysse, M.D. 678

## Individual and Societal Effects of Mental Disorders on Earnings in the United States: Results From the National Comorbidity Survey Replication

Ronald C. Kessler et al. 703

## ◀ Reduced Amygdala Response to Fearful Expressions in Children and Adolescents With Callous-Unemotional Traits and Disruptive Behavior Disorders

Abigail A. Marsh et al. 712

Continuing Medical Education 783

June 2008

Volume 165 • Number 6

Official Journal of the  
AMERICAN PSYCHIATRIC ASSOCIATION

[ajp.psychiatryonline.org](http://ajp.psychiatryonline.org)
